# Supplementary material for: Synthesis of high-performance multifunctional electrode material using sweetwood lignin as a precursor
Source: Royal Society of Chemistry journal article supplement (doi:10.1039/d4nj03930k), 2024-12-11
Supplement: d4nj03930k1.pdf [file d4nj03930k1.pdf]

Supplementary material

**Synthesis of high-performance multifunctional electrode material  
using sweetwood lignin as a precursor**

Loreta Tamasauskaite-Tamasiunaite<sup>1,\*</sup>, Daina Upskuviene<sup>1</sup>, Aldona Balciunaite<sup>1</sup>, Dijana Simkunaitė<sup>1</sup>, Vitalija Jasulaitiene<sup>1</sup>, Gediminas Niaura<sup>1</sup>, Jolita Jablonskiene<sup>1</sup>, Ramunas Levinas<sup>1</sup>, Ance Plavniece<sup>2</sup>, Aleksandrs Volperts<sup>2</sup>, Galina Dobeles<sup>2</sup>, A. Zhurinh<sup>2</sup>, Ivar Kruusenberg<sup>3</sup>, Kätlin Kaare<sup>3</sup>, Luis César Colmenares-Rausseo<sup>4</sup>, Eugenijus Norkus<sup>1</sup>

<sup>1</sup> Center for Physical Sciences and Technology (FTMC), Vilnius, Lithuania

<sup>2</sup> Latvian State Institute of Wood Chemistry, Riga, Latvia

<sup>3</sup> National Institute of Chemical Physics and Biophysics, Tallinn, Estonia

<sup>4</sup> SINTEF Industry, Batteries and Hydrogen Technologies, Trondheim, Norway

## Experimental

The Koutecky-Levich equation was used to analyze the number of electrons being transferred during the redox reaction [1]:

$$j^{-1} = j_K^{-1} + j_L^{-1} \quad (1)$$

$$j_L = B\omega^{1/2} \quad (2)$$

$$B = 0.62nFD^{2/3} \nu^{1/6}C \quad (3)$$

where  $j$ ,  $j_K$ , and  $j_L$  are the measured current density, the kinetic-limiting density, and the diffusion-limiting current density, respectively;  $\omega$  is the rotation speed in rpm,  $F$  is the Faraday constant (96,485 C mol<sup>-1</sup>),  $D$  is the diffusion coefficient of oxygen in 0.1 M KOH ( $1.9 \times 10^{-5}$  cm<sup>2</sup> s<sup>-1</sup>),  $\nu$  is the kinetic viscosity (0.01 cm<sup>2</sup> s<sup>-1</sup>), and  $C$  is the bulk concentration of oxygen ( $1.2 \times 10^{-6}$  mol cm<sup>-3</sup>) [2]. Based on the above equations, the slope of  $B^{-1}$  can be obtained by a linear fitting of  $j^{-1}$  vs.  $\omega^{-1/2}$ , which gives the corresponding  $n$  value.

## Results and Discussion

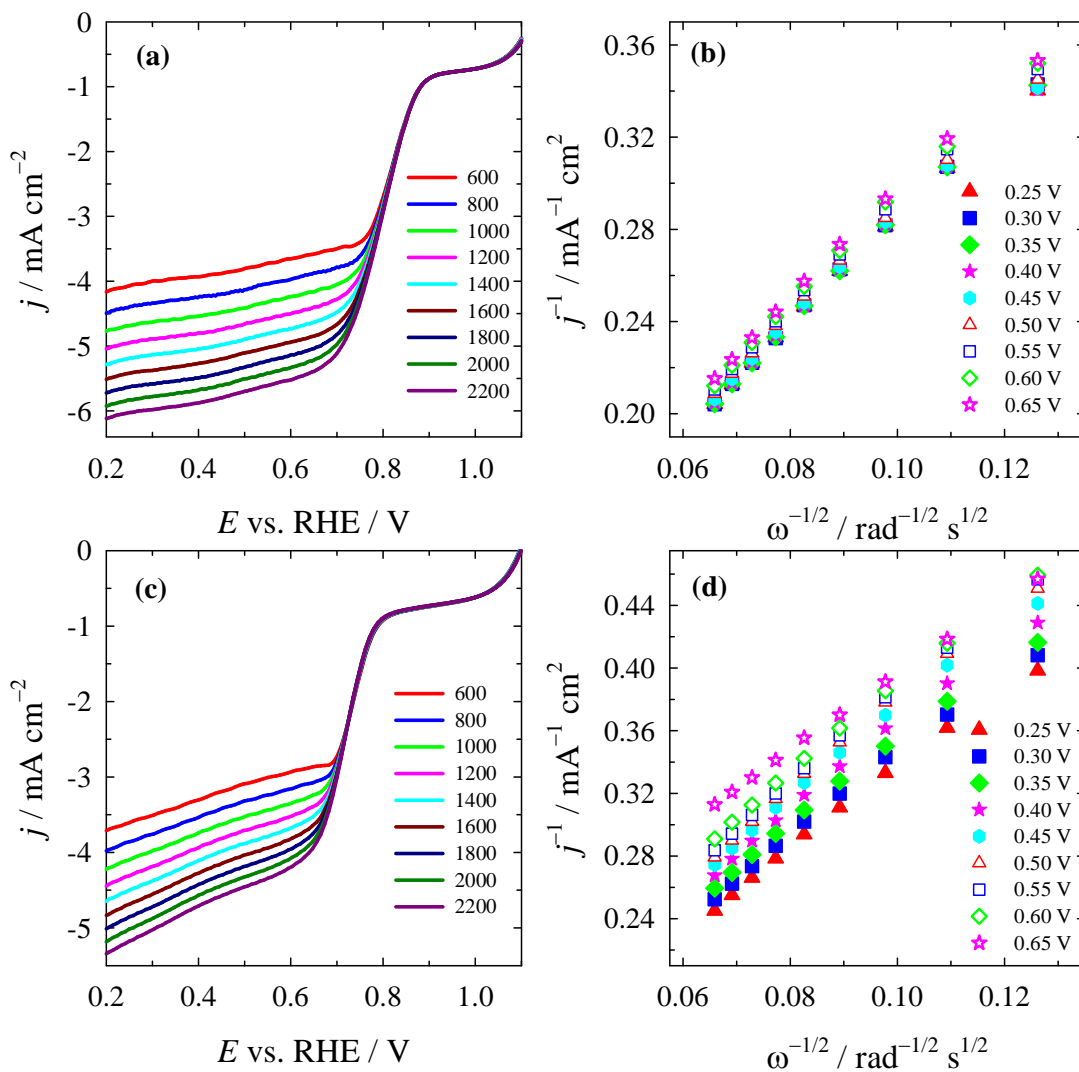

**Fig. S1.** LSVs recorded on N-AC-L (a) and AC-L (c) in  $\text{O}_2$ -saturated 0.1 M KOH at  $10 \text{ mV s}^{-1}$  at different rotation rates. (b, d) The corresponding Koutecky–Levich plots at 0.20–0.60 V electrode potentials.

**Table S1.** A summary of the ORR performance of current state-of-the-art non-metallic catalysts based on heteroatom-doped carbon and representative advanced biomass-derived catalysts.

| Material                                                                       | Electro-lyte | $E_{\text{onset}}$ , V vs. RHE | $E_{1/2}$ , V vs. RHE | $n$     | $j_{\text{lim}}$ at 1600 rpm, mA cm <sup>-2</sup> | Ref.       |
|--------------------------------------------------------------------------------|--------------|--------------------------------|-----------------------|---------|---------------------------------------------------|------------|
| N-AC-L                                                                         | 0.1 M KOH    | 0.95                           | 0.83                  | 4       | 5.5                                               | This study |
| N-doped alkaline lignin (N-ALC)                                                | 0.1 M KOH    | 0.96<br>0.98 for Pt/C          | 0.84                  |         | 2.03                                              | [3]        |
| N,P-doped nanocomposite carbon, 0.3 mg cm <sup>-2</sup>                        | 0.1 M KOH    | 0.93 for 1.01 Pt/C             | 0.68                  | ~4      | 3.8<br>~4 for Pt/C                                | [4]        |
| NSCMS-MLSM                                                                     | 0.1 M KOH    |                                | 0.83                  | 2       | 4.78                                              | [5]        |
| n-HPFN@CQDs                                                                    | 0.1 M KOH    | 0.93                           | 0.85                  | 4       | 4.6                                               | [6]        |
| 2D, N,S-Graphitic sheet 0.64 mg cm <sup>-2</sup>                               | 0.1 M KOH    | 1.01                           | ~0.87                 | 3.85    | 5.1                                               | [7]        |
| N,P-C@GO 0.2 mg cm <sup>-2</sup>                                               | 0.1 M KOH    | Close to Pt/C                  | -                     | 3.7     | 16.9<br>17 for Pt/C                               | [8]        |
| g-C <sub>3</sub> N <sub>4</sub> @N doped C nanosheet 0.204 mg cm <sup>-2</sup> | 0.1 M KOH    | ~0.89                          | 0.75<br>0.73 for Pt/C | 3.9-4.0 | ~3.2-5.8<br>~6 for Pt/C                           | [9]        |
| N-doped graphene nanoribbon 0.6 mg cm <sup>-2</sup>                            | 1 M KOH      | 0.92<br>0.94 for Pt/C          | 0.84<br>0.85 for Pt/C | 3.95    | ~3-3.5<br>close to Pt/C                           | [10]       |
| N, P co-doped C 0.15 mg cm <sup>-2</sup>                                       | 0.1 M KOH    | 0.94                           | 0.85<br>Close to Pt/C | ~4      | ~4.25<br>~5.5 for Pt/C                            | [11]       |
| P-doped C <sub>3</sub> N <sub>4</sub> @C fiber                                 | 0.1 M KOH    | 0.94<br>0.99 for               | 0.67<br>0.8 for Pt-   | ~4      | ~10,<br>~15-20 for                                | [12]       |

| paper direct electrode                                                |           | Pt-CFP    | CFP                            |         | Pt-CFP                     |      |
|-----------------------------------------------------------------------|-----------|-----------|--------------------------------|---------|----------------------------|------|
| N, P co-doped C<br>0.2 mg cm <sup>-2</sup>                            | 0.1 M KOH | 0.95      | ~0.8 V                         | 3.9     | ~4.98,<br>4.86 for<br>Pt/C | [13] |
| N, O, S-tri-doped C<br>0.203 mg cm <sup>-2</sup>                      | 0.1 M KOH | 0.96      | 0.74                           | ~4      | 4.5-6                      | [14] |
| B, N co-doped graphene                                                | 0.1 M KOH | ~0.9      |                                | ~4      | -5.2,<br>close to<br>Pt/C  | [15] |
| N, S co-doped graphene                                                | 0.1 M KOH | ~0.91     |                                | 3.3-3.6 | ~10<br>Close to<br>Pt/C    | [16] |
| porous g-C <sub>3</sub> N <sub>4</sub> @C<br>0.17 mg cm <sup>-2</sup> | 0.1 M KOH | >0.9      | -                              | 3       | ~5<br>~4 for Pt/C          | [17] |
| N doped C; S,<br>N-doped C from chitosan<br>0.4 mg cm <sup>-2</sup>   | 0.1 M KOH | 0.9; 0.93 | -                              | 3.9; 4  | ~12<br>~10 for<br>Pt/C     | [18] |
| N doped C from amaranthus                                             | 0.1 M KOH | 1.196     | -                              | 4       | 4.38<br>4.66 for<br>Pt/C   | [19] |
| N doped C nanosheet from monkey grass                                 |           | 0.87      | -                              | 4       | 4.9<br>3.7 for Pt/C        | [20] |
| N doped C from ginko leave<br>0.71 mg cm <sup>-2</sup>                | 0.1 M KOH | ~0.9      | positive<br>0.154 V to<br>Pt/C | 3.7     | 5.5<br>Close to<br>Pt/C    | [21] |
| N doped C from willow leave<br>0.4 mg cm <sup>-2</sup>                | 0.1 M KOH | 0.925     | -                              | 3.1     | ~3.7                       | [22] |
| Fe@C@N doped C from soybean<br>~0.5 mg cm <sup>-2</sup>               | 0.1 M KOH | 0.84      | Positive<br>0.17 V to<br>Pt/C  |         | ~2.2<br>2.5 for Pt/C       | [23] |
| N doped C from bamboo fungi                                           | 0.1 M KOH | 1.007     |                                | 3.55    | ~3.5<br>~4 for Pt/C        | [24] |

|                                                                                               |           |      |                               |      |                        |      |
|-----------------------------------------------------------------------------------------------|-----------|------|-------------------------------|------|------------------------|------|
| Co <sub>3</sub> O <sub>4</sub> @N<br>doped C from<br>blood powder<br>0.56 mg cm <sup>-2</sup> | 0.1 M KOH | 0.9  | Positive<br>0.05 V to<br>Pt/C | 3.93 | ~6<br>~5.5 for<br>Pt/C | [25] |
| CoFe <sub>2</sub> O <sub>4</sub> @N, P<br>co-doped C from<br>yeast<br>0.5 mg cm <sup>-2</sup> | 0.1 M KOH | ~0.8 |                               | 3.56 | ~5.6                   | [26] |
| N doped C from<br>bacillus subtilis                                                           | 0.1 M KOH | 0.93 |                               | 3.96 | ~5                     | [27] |

**Table S2.** Electrochemical performance comparison among carbon materials in aqueous electrolytes.

| Sample                                            | Surface area, $\text{m}^2 \text{g}^{-1}$ | Specific capacitance ( $\text{F g}^{-1}$ ) / scan rate ( $\text{mV s}^{-1}$ ) | Electrolyte                                                  | Ref.       |
|---------------------------------------------------|------------------------------------------|-------------------------------------------------------------------------------|--------------------------------------------------------------|------------|
| AC (activated carbon)                             | -                                        | 22.3 / 2                                                                      | 4 M $\text{NaNO}_3$ -EG                                      | [28]       |
| AC (activated carbon)                             | 2066                                     | 116 / 2                                                                       | 1 M $\text{NaNO}_3$                                          | [29]       |
| Graphene/CNF                                      | -                                        | 74 / 1                                                                        | 1.4 M $\text{Li}_2\text{SO}_4$ (70%) + ethylene glycol (30%) | [30]       |
| Microporous AC                                    | 2244                                     | 116 / 2                                                                       | 2 M $\text{Li}_2\text{SO}_4$                                 | [31]       |
| NCS-700 (nitrogen-doped porous carbon nanosheets) | 1497.4                                   | 64.4 / 2                                                                      | 1 M $\text{Na}_2\text{SO}_4$                                 | [32]       |
| VN/MWCNT                                          | -                                        | 160.3 / 2                                                                     | 0.5 M $\text{Na}_2\text{SO}_4$                               | [33]       |
| AC (derived from banana fibers)                   | 1097                                     | 74 <sup>a</sup>                                                               | 1 M $\text{Na}_2\text{SO}_4$                                 | [34]       |
| Castor shell                                      | 1468                                     | 65 <sup>a</sup>                                                               | 1 M $\text{Na}_2\text{SO}_4$                                 | [35]       |
| AC-800-3 (derived from torreyia grandis shell)    | 2100.8                                   | 142.6 / 50                                                                    | 0.5 M $\text{Na}_2\text{SO}_4$                               | [36]       |
| N-AC-L (derived from sweetwood lignin)            | 2690                                     | 106 / 5                                                                       | 1 M $\text{Na}_2\text{SO}_4$                                 | This study |

<sup>a</sup> Two electrode measurements

## References

- [1] A. J. Bard and L. R. Faulkner, *Electrochemical Methods: Fundamentals and Applications*, 2nd ed., New York: Wiley, 2001.
- [2] K. Kaare, E. Yu, T. Käämbre, A. Volperts, G. Dobele, A. Zhurinsh, G. Niaura, L. Tamasauskaite-Tamasiunaite, E. Norkus and I. Kruusenberg, Biomass-derived graphene-like catalyst material for oxygen reduction reaction, *ChemNanoMat*, 2021, **7(3)**, 307.
- [3] Z. Li, Y. Feng, X. Qu, Y. Yang, L. Dong, T. Lei and S. Ren, Impact of different lignin sources on nitrogen-doped porous carbon toward the electro-catalytic oxygen reduction reaction, *Int. J. Environ. Res. Public Health.*, 2023, **20**, 4383.
- [4] D. Yuan, Y. Li, Q. She and X. Zhu, Lignin-derived dual-doped carbon nanocomposites as low-cost electrocatalysts, *Colloids Surf. A: Physicochem. Eng. Asp.*, 2023, **663**, 131105.
- [5] Y. Han, D. Yan, Z. Ma, Q. Wang, X. Wang, Y. Li and G. Sun, Lignin-derived sulfonate base metal-free N, S co-doped carbon microspheres doped with different nitrogen sources as catalysts for oxygen reduction reactions, *Int. J. Biol. Macromol.*, 2023, **244**, 125363.
- [6] Z. Ma, Y. Han, X. Wang, G. Sun and Y. Li, Lignin-derived hierarchical porous flower-like carbon nanosheets decorated with biomass carbon quantum dots for efficient oxygen reduction, *Colloids Surf. A: Physicochem. Eng. Asp.*, 2022, **652**, 129818.
- [7] C. Hu and L. Dai, Multifunctional carbon-based metal-free electrocatalysts for simultaneous oxygen reduction, oxygen evolution, and hydrogen evolution, *Adv. Mater.*, 2017, **29(9)**, 1604942.
- [8] J. Zhang, L. Qu, G. Shi, J. Liu, J. Chen and L. Dai, N,P-codoped carbon networks as efficient metal-free bifunctional catalysts for oxygen reduction and hydrogen evolution reactions, *Angew. Chem. Int. Ed.*, 2016, **55(6)**, 2230.
- [9] H. Yu, L. Shang, T. Bian, R. Shi, G.I. Waterhouse, Y. Zhao, C. Zhou, L.Z. Wu, C.H. Tung and T. Zhang, Nitrogen-doped porous carbon nanosheets templated from g-C<sub>3</sub>N<sub>4</sub> as metal-free electrocatalysts for efficient oxygen reduction reaction, *Adv. Mater.*, 2016, **28(25)**, 5080.
- [10] H.B. Yang, J. Miao, S.-F. Hung, J. Chen, H.B. Tao, X. Wang, L. Zhang, R. Chen, J. Gao, H.M. Chen, L. Dai and B. Liu, Identification of catalytic sites for oxygen reduction and oxygen evolution in N-doped graphene materials: Development of highly efficient metal-free bifunctional electrocatalyst, *Sci. Adv.*, 2016, **2**, 1501122,
- [11] J. Zhang, Z. Zhao, Z. Xia and L. Dai, A metal-free bifunctional electrocatalyst for oxygen reduction and oxygen evolution reactions, *Nat. Nanotechnol.*, 2015, **10(5)**, 444.
- [12] T.Y. Ma, J. Ran, S. Dai, M. Jaroniec and S.Z. Qiao, Phosphorus-doped graphitic carbon nitrides grown in situ on carbon-fiber paper: flexible and reversible oxygen electrodes, *Angew. Chem. Int. Ed.*, 2015, **54(15)**, 4646.
- [13] Y. Zhu, Y. Liu, Y. Liu, T. Ren, G. Du, T. Chen and Z. Yuan, Heteroatom-doped hierarchical porous carbons as high-performance metal-free oxygen reduction electrocatalysts, *J. Mater. Chem. A*, 2015, **3(22)**, 11725.
- [14] Y. Meng, D. Voiry, A. Goswami, X. Zou, X. Huang, M. Chhowalla, Z. Liu and T. Asefa, N-, O-, and S-tridoped nanoporous carbons as selective catalysts for oxygen reduction and alcohol oxidation reactions, *J. Am. Chem. Soc.*, 2014, **136(39)**, 13554.



- [15] Y. Zheng, Y. Jiao, L. Ge, M. Jaroniec and S.Z. Qiao, Two-step boron and nitrogen doping in graphene for enhanced synergistic catalysis, *Angew. Chemie Int. Ed.*, 2013, **52(11)**, 3110.
- [16] J. Liang, Y. Jiao, M. Jaroniec and S.Z. Qiao, Sulfur and nitrogen dual-doped mesoporous graphene electrocatalyst for oxygen reduction with synergistically enhanced performance, *Angew. Chemie Int. Ed.*, 2012, **51(46)**, 11496.
- [17] J. Liang, Y. Zheng, J. Chen, J. Liu, D. Hulicova-Jurcakova, M. Jaroniec and S.Z. Qiao, Facile oxygen reduction on a three-dimensionally ordered macroporous graphitic C<sub>3</sub>N<sub>4</sub>/carbon composite electrocatalyst, *Angew. Chem.*, 2012, **124(16)**, 3958.
- [18] T.X. Wu, G.Z. Wang, X. Zhang, C. Chen, Y.X. Zhang and H.J. Zhao, Transforming chitosan into N-doped graphitic carbon electrocatalysts, *Chem. Commun.*, 2015, **51(7)**, 1334.
- [19] S. Gao, K. Geng, H. Liu, X. Wei, M. Zhang, P. Wang and J. Wang, Transforming organic-rich amaranthus waste into nitrogen-doped carbon with superior performance of the oxygen reduction reaction, *Energy Environm. Sci.*, 2015, **8(1)**, 221.
- [20] H. Zhang, Y. Wang, D. Wang, Y. Li, X. Liu, P. Liu, H. Yang, T. An, Z. Tang and H. Zhao, Hydrothermal transformation of dried grass into graphitic carbon-based high performance electrocatalyst for oxygen reduction reaction, *Small*, 2014, **10(16)**, 3371.
- [21] F. Pan, Z. Cao, Q. Zhao, H. Liang and J. Zhang, Nitrogen-doped porous carbon nanosheets made from biomass as highly active electrocatalyst for oxygen reduction reaction, *J. Power Sources*, 2014, **272 (Supplement C)**, 8.
- [22] S. Gao, Y. Chen, H. Fan, X. Wei, C. Hu, L. Wang and L. Qu, A green one-arrow-two-hawks strategy for nitrogen-doped carbon dots as fluorescent ink and oxygen reduction electrocatalysts, *J. Mater. Chem. A*, 2014, **2(18)**, 6320.
- [23] C.-Z. Guo, W.-L. Liao and C.-G. Chen, Design of a non-precious metal electrocatalyst for alkaline electrolyte oxygen reduction by using soybean biomass as the nitrogen source of electrocatalytically active center structures, *J. Power Sources*, **269 (Supplement C)**, 2014, 841.
- [24] S. Gao, H. Fan and S. Zhang, Nitrogen-enriched carbon from bamboo fungus with superior oxygen reduction reaction activity, *J. Mater. Chem. A*, 2014, **2(43)**, 18263.
- [25] C. Zhang, M. Antonietti and T.-P. Feller, Blood Ties: Co<sub>3</sub>O<sub>4</sub> decorated blood derived carbon as a superior bifunctional electrocatalyst, *Adv. Func. Mater.*, 2014, **24(48)**, 7655.
- [26] S. Liu, W. Bian, Z. Yang, J. Tian, C. Jin, M. Shen, Z. Zhou and R. Yang, A facile synthesis of CoFe<sub>2</sub>O<sub>4</sub>/biocarbon nanocomposites as efficient bi-functional electrocatalysts for the oxygen reduction and oxygen evolution reaction, *J. Mater. Chem. A*, 2014, **2(42)**, 18012.
- [27] H. Zhu, J. Yin, X. Wang, H. Wang and X. Yang, Microorganism-derived heteroatom-doped carbon materials for oxygen reduction and supercapacitors, *Adv. Funct. Mater.*, 2013, **23(10)**, 1305.
- [28] C. Ramasamy, J. Palma del Val and M. Anderson, An analysis of ethylene glycol-aqueous based electrolyte system for supercapacitor applications, *J. Power Sources*, 2014, **248**, 370.
- [29] Q. Abbas, D. Pajak, E. Frackowiak and F. Béguin, Effect of binder on the performance of carbon/carbon symmetric capacitors in salt aqueous electrolyte, *Electrochim. Acta*, 2014, **140**, 132.

- [30] R. Vellacheri, A. Al-Haddad, H. Zhao, W. Wang, C. Wang and Y. Lei, High performance supercapacitor for efficient energy storage under extreme environmental temperatures, *Nano Energy*, 2014, **8**, 231.
- [31] Q. Gao, Optimizing carbon/carbon supercapacitors in aqueous alkali sulfates electrolytes, *J. Energy Chem.*, 2019, **38**, 219.
- [32] C. Fan, Y. Tian, S. Bai, C. Zhang and X. Wu, Nitrogen-doped porous carbon nanosheets for high-performance supercapacitors, *J. Energy Storage*, 2021, **44**, 103492.
- [33] Y. Su and I. Zhitomirsky, Hybrid MnO<sub>2</sub>/carbon nanotube-VN/carbon nanotube supercapacitors, *J. Power Sources*, 2014, **267**, 235.
- [34] V. Subramanian, Cheng Luo, A.M. Stephan, K.S. Nahm, S. Thomas and B. Wei, Supercapacitors from activated carbon derived from banana fibers, *J. Phys. Chem. C*, 2007, **111**, 7527.
- [35] C.A. Okonkwo, G. Li, Y. Li, T. Lv, L. Jia, C.C. Okoye and S.N. Oba, Liquid nitrogen-controlled direct pyrolysis/KOH activation mediated micro-mesoporous carbon synthesis from castor shell for enhanced performance of supercapacitor electrode, *Biomass Convers. Biorefin.*, 2021, **13(4)**, 1.
- [36] H. Xuan, G. Lin, F. Wang, J. Liu, X. Dong and F. Xi, Preparation of biomass-activated porous carbons derived from *torreya grandis* shell for high-performance supercapacitor, *J. Solid State Electrochem.*, 2017, **21**, 2241.
